# Supplementary material for: Aqueous phase selective detection of 2,4,6-trinitrophenol using a fluorescent metal–organic framework with a pendant recognition site
Source: Royal Society of Chemistry journal article supplement (doi:10.1039/c5dt00397k), 2015-01-01
Supplement: c5dt00397k1.pdf [file c5dt00397k1.pdf]

## **Electronic Supplementary Information**

### **Aqueous phase selective 2,4,6-trinitrophenol detection via fluorescent metal-organic framework with pendant recognition site**

Sanjog S. Nagarkar,<sup>†</sup> Aamod V. Desai,<sup>†</sup> Partha Samanta<sup>†</sup> and Sujit K. Ghosh<sup>\*,†</sup>

<sup>†</sup>*Indian Institute of Science Education and Research (IISER), Dr. Homi Bhabha Road, Pashan, Pune-411 008, (India).*

**E-mail:** [sghosh@iiserpune.ac.in](mailto:sghosh@iiserpune.ac.in)

**Tel:** +91-20- 25908076

**Fax:** +91-20-25908022

## Figures:-

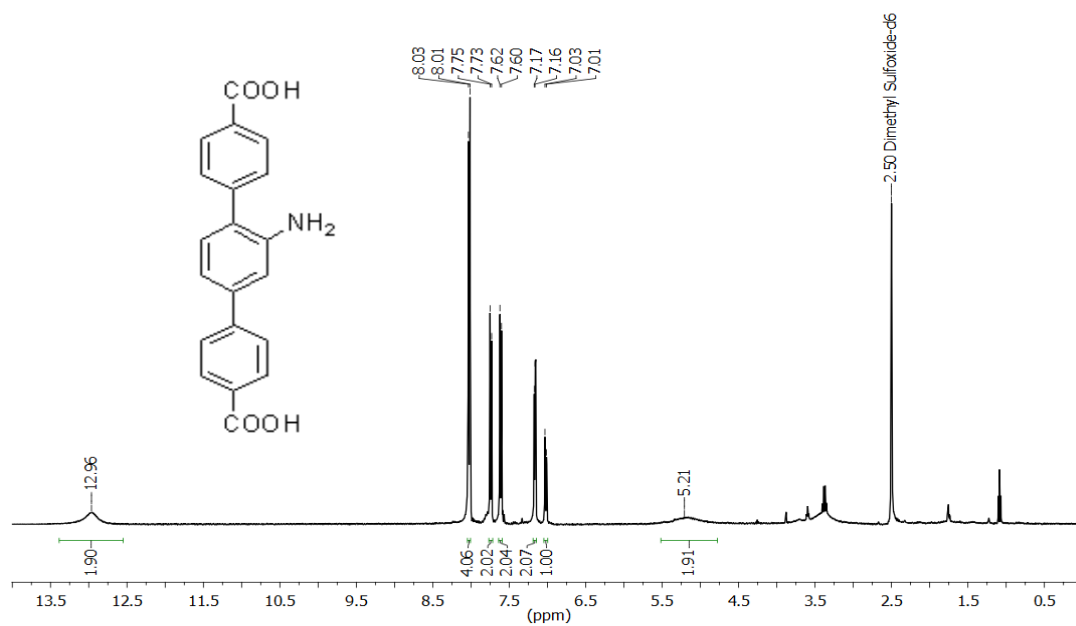

**Figure S1:**  $^1\text{H}$  NMR of ligand L in DMSO- $d_6$ .

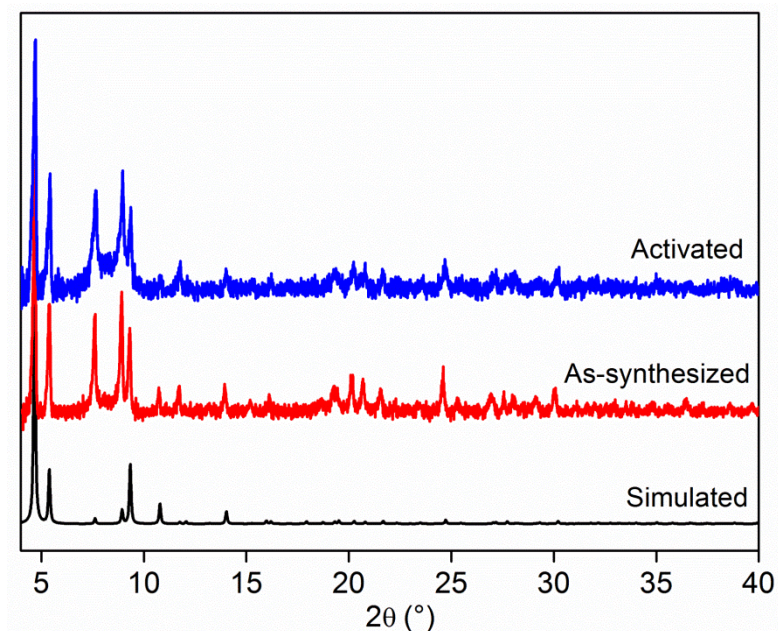

**Figure S2:** Powder X-ray diffraction patterns (PXRD) of simulated, as-synthesized and activated MOF 1.

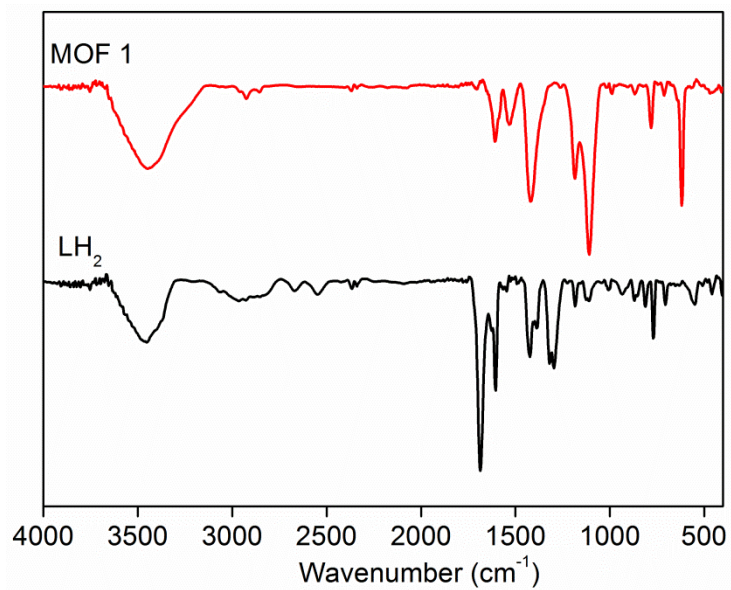

**Figure S3:** FT-IR spectra of Ligand LH<sub>2</sub> and MOF 1.

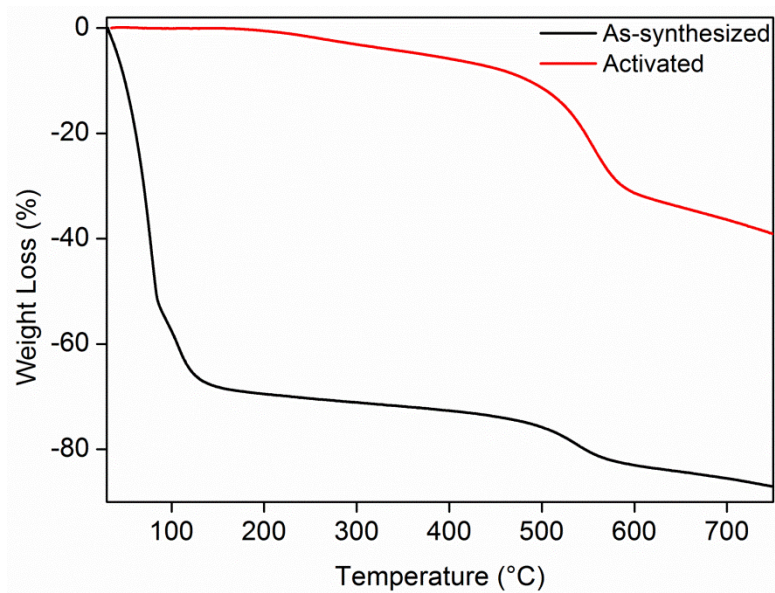

**Figure S4:** Thermogravimetric analysis of as-synthesized and activated MOF 1.

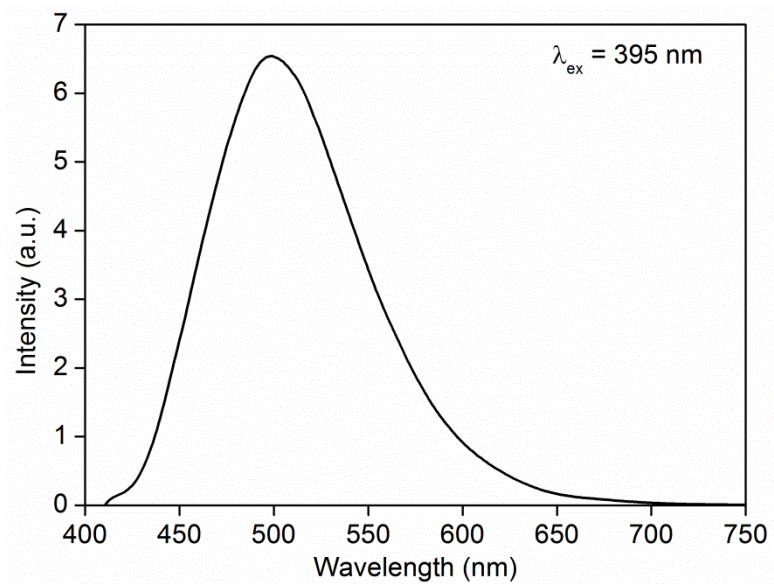

**Figure S5:** Emission spectra of MOF (**1'**) dispersed in water upon excitation at 395 nm.

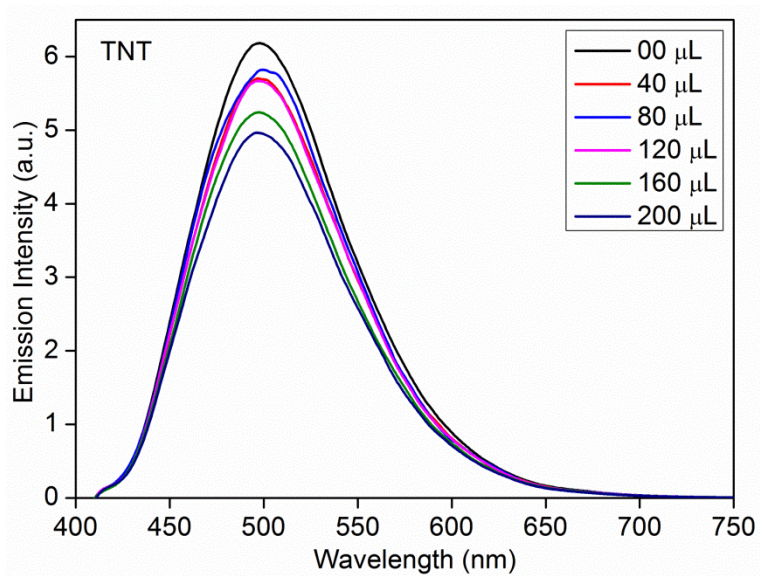

**Figure S6:** Emission spectra of MOF (**1'**) dispersed in water upon incremental addition of TNT solution (1mM) in water.



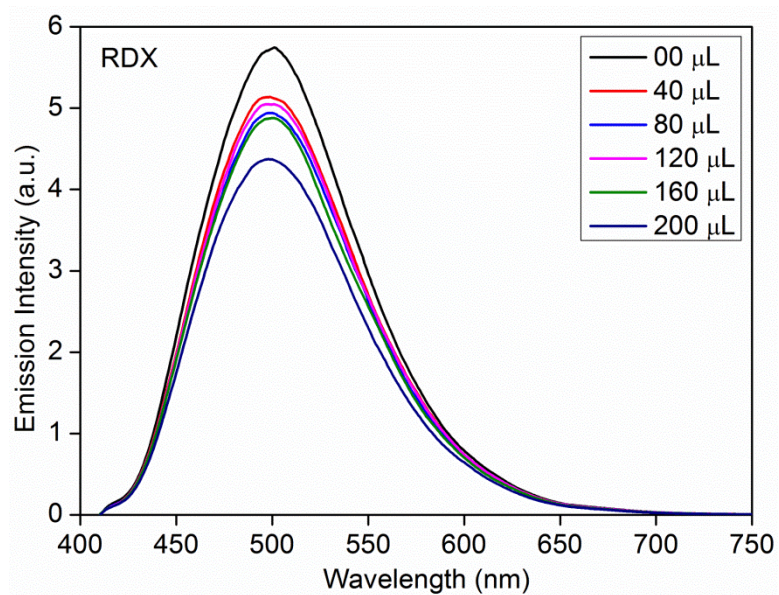

**Figure S7:** Emission spectra of MOF (1') dispersed in water upon incremental addition of RDX solution (1mM) in water.

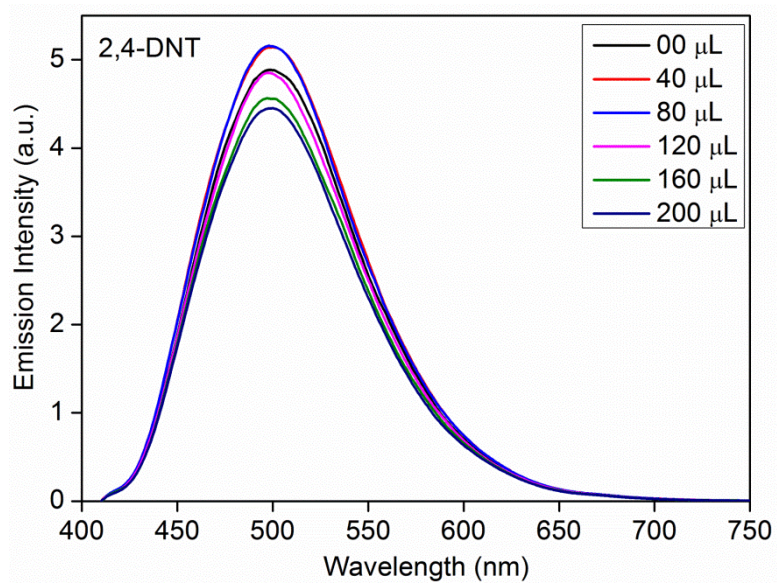

**Figure S8:** Emission spectra of MOF (1') dispersed in water upon incremental addition of 2,4-DNT solution (1mM) in water.

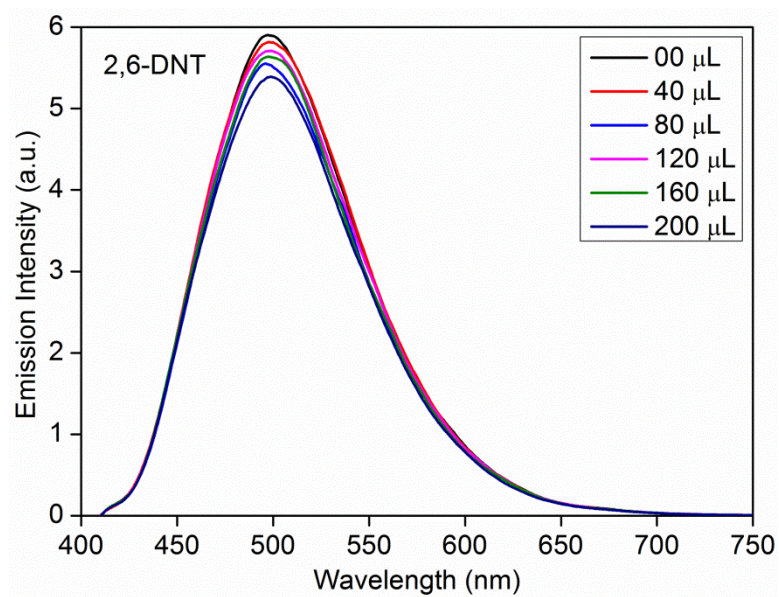

**Figure S9:** Emission spectra of MOF (**1'**) dispersed in water upon incremental addition of 2,6-DNT solution (1mM) in water.

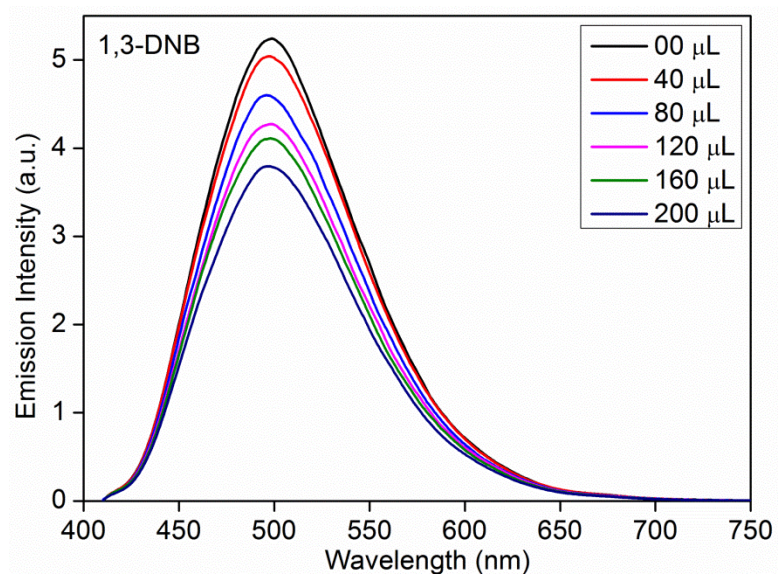

**Figure S10:** Emission spectra of MOF (**1'**) dispersed in water upon incremental addition of 1,3-DNB solution (1mM) in water.



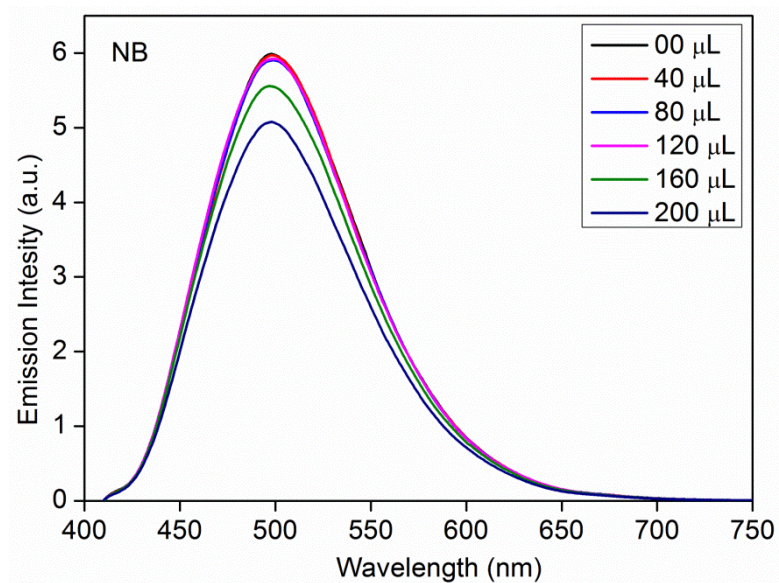

**Figure S11:** Emission spectra of MOF (**1'**) dispersed in water upon incremental addition of NB solution (1mM) in water.

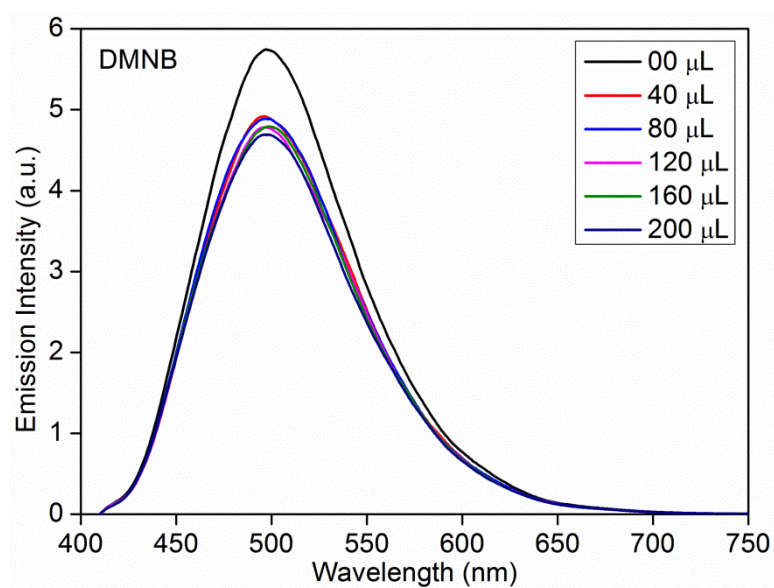

**Figure S12:** Emission spectra of MOF (**1'**) dispersed in water upon incremental addition of DMNB solution (1mM) in water.

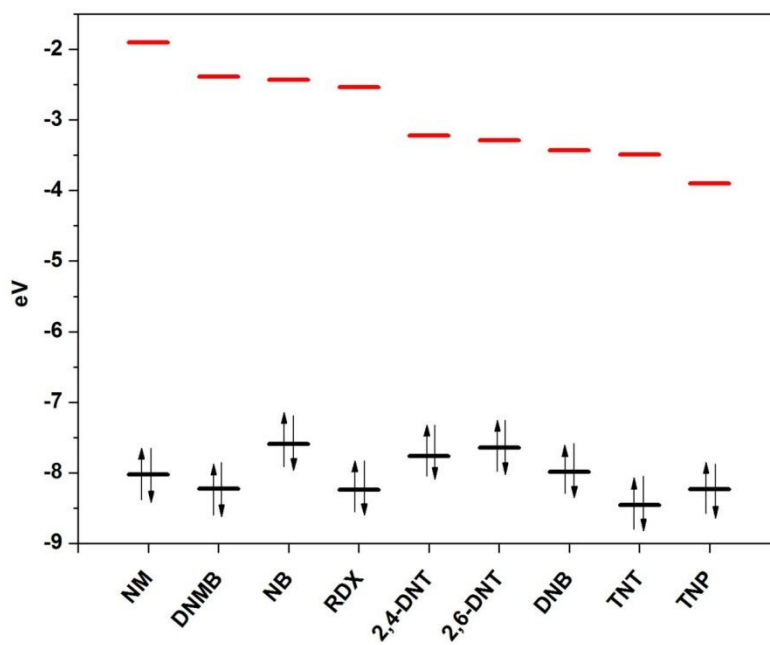

**Figure S13:** HOMO and LUMO energies of electron deficient nitro explosives (at B3LYP/6-31G\* level of theory).<sup>2</sup>

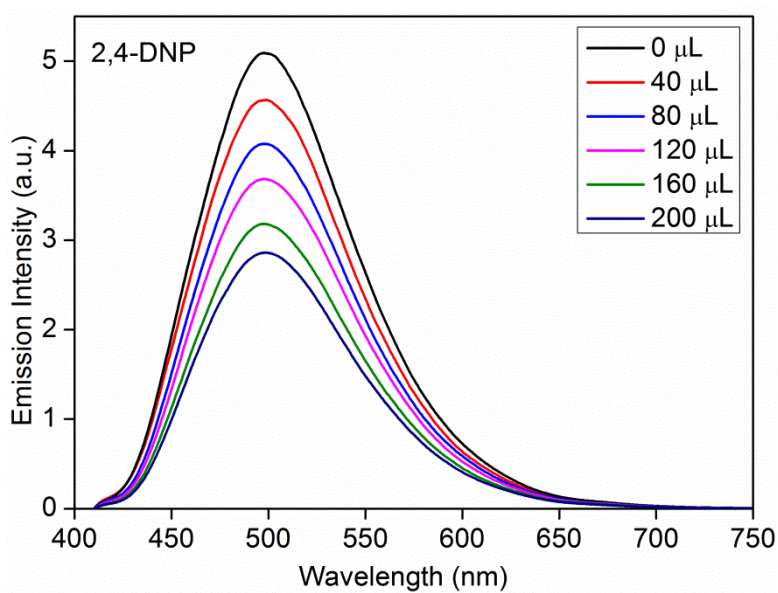

**Figure S14:** Emission spectra of MOF (**1'**) dispersed in water upon incremental addition of 2,4-DNP solution (1mM) in water.



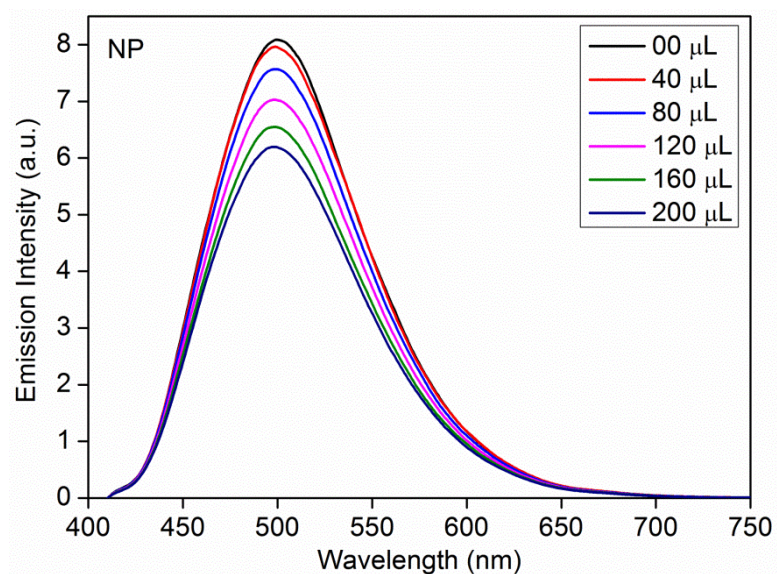

**Figure S15:** Emission spectra of MOF (**1'**) dispersed in water upon incremental addition of NP solution (1mM) in water.

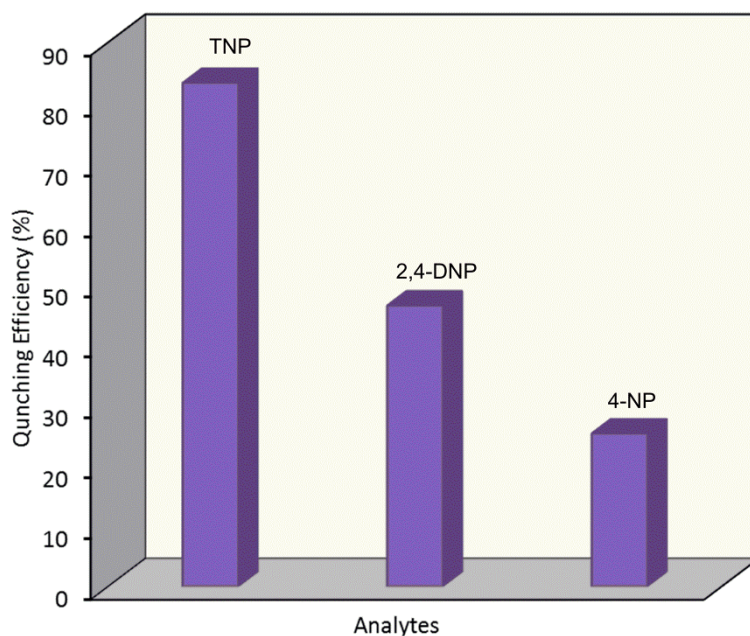

**Figure S16:** Comparison of percentage fluorescence quenching obtained upon addition of TNP, 2,4-DNP, NP to **1'** dispersed in water.

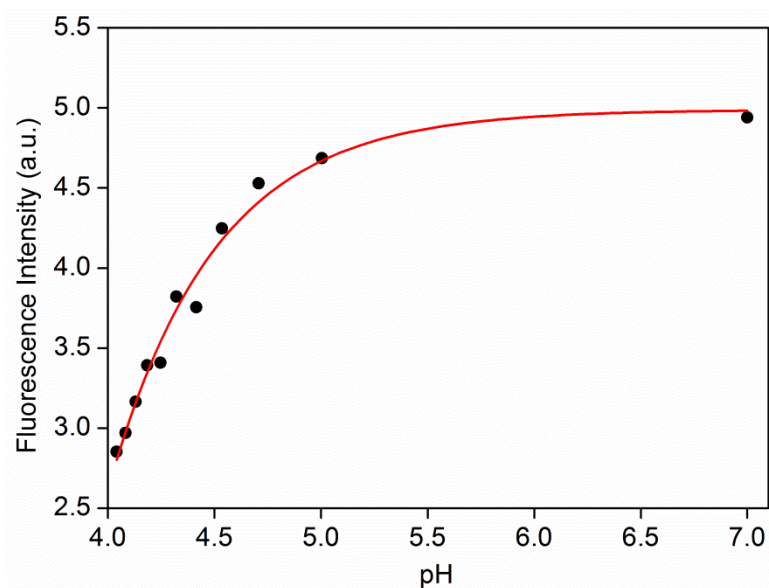

**Figure S17:** Effect of pH on fluorescence intensity of MOF 1'.

## **Table:**

**Table S1:- Approximate sizes of explosive analytes.<sup>2</sup>**

| No. | Analytes | Approximate Size (D × W × L, Å) |
|-----|----------|---------------------------------|
| 1   | TNT      | 5.6 X 7.7 X 10.2                |
| 2   | RDX      | 5.8 X 6.3 X 8.8                 |
| 3   | TNP      | 5.0 X 6.2 X 7.1                 |
| 4   | 2,6 DNT  | 5.6 X 7.7 X 9.5                 |
| 5   | 2,4 DNT  | 5.6 X 7.7 X 10.1                |
| 6   | 1,3 DNB  | 5.0 X 7.7 X 8.6                 |
| 7   | NB       | 3.4 X 6.2 X 8.6                 |
| 8   | DMNB     | 7.1 X 7.3 X 7.7                 |

## **References:**

- 1) A. Schaate, P. Roy, A. Godt, J. Lippke, F. Waltz, M. Wiebcke and P. Behrens, *Chem. Eur. J.*, 2011, **17**, 6643.
- 2) S. S. Nagarkar, B. Joarder, A. K. Chaudhari, S. Mukherjee and S. K. Ghosh, *Angew. Chem., Int. Ed.*, 2013, **52**, 2881.
